# Supplementary material
Source: PubMed Central journal article supplement (PMC4436591)
Supplement: NIHMS686350-supplement-01.pdf [file NIHMS686350-supplement-01.pdf]

- Ramamoorthy, S., Bauman, A.L., Moore, K.R., Han, H., Yang-Feng, T., Chang, A.S., Ganapathy, V. & Blakely, R.D. (1993) Antidepressant and cocaine-sensitive human serotonin transporter: molecular cloning, expression, and chromosomal localization. *Proc Natl Acad Sci U S A* **90**, 2542–2546.
- Ramamoorthy, S., Shippenberg, T.S. & Jayanthi, L.D. (2011) Regulation of monoamine transporters: role of transporter phosphorylation. *Pharmacol Ther* **129**, 220–238.
- Rao, N.P., Danivas, V., Venkatasubramanian, G., Behere, R.V. & Gangadhar, B.N. (2010) Comorbid bipolar disorder and Usher syndrome. *Prim Care Companion J Clin Psychiatry* **12**, PCC.09100792.
- Rijavec, N. & Grubic, V.N. (2009) Usher syndrome and psychiatric symptoms: a challenge in psychiatric management. *Psychiatr Danub* **21**, 68–71.
- Rioux, J.D., Xavier, R.J., Taylor, K.D. et al. (2007) Genome-wide association study identifies new susceptibility loci for Crohn disease and implicates autophagy in disease pathogenesis. *Nat Genet* **39**, 596–604.
- Rottach, K.G., Schaner, B.M., Kirch, M.H., Zivotofsky, A.Z., Teufel, L.M., Gallwitz, T. & Messer, T. (2008) Restless legs syndrome as side effect of second generation antidepressants. *J Psychiatr Res* **43**, 70–75.
- Schmittgen, T.D. & Livak, K.J. (2008) Analyzing real-time PCR data by the comparative C(T) method. *Nat Protoc* **3**, 1101–1108.
- Soiza-Reilly, M., Anderson, W.B., Vaughan, C.W. & Commons, K.G. (2013) Presynaptic gating of excitation in the dorsal raphe nucleus by GABA. *Proc Natl Acad Sci U S A* **110**, 15800–15805.
- Sorte, H.S., Gjevick, E., Sponheim, E., Eiklid, K.L. & Rodningen, O.K. (2013) Copy number variation findings among 50 children and adolescents with autism spectrum disorder. *Psychiatr Genet* **23**, 61–69.
- Steiner, J.A., Carneiro, A.M. & Blakely, R.D. (2008) Going with the flow: trafficking-dependent and -independent regulation of serotonin transport. *Traffic* **9**, 1393–1402.
- Stevens, R.J., Akbergenova, Y., Jorquera, R.A. & Littleton, J.T. (2012) Abnormal synaptic vesicle biogenesis in *Drosophila* synaptogyrin mutants. *J Neurosci* **32**, 18054–18067.
- Sudhof, T.C. (2008) Neuroligins and neuroligins link synaptic function to cognitive disease. *Nature* **455**, 903–911.
- Sun, C., Cheng, M.C., Qin, R., Liao, D.L., Chen, T.T., Koong, F.J., Chen, G. & Chen, C.H. (2011) Identification and functional characterization of rare mutations of the neuroligin-2 gene (NLGN2) associated with schizophrenia. *Hum Mol Genet* **20**, 3042–3051.
- Sutcliffe, J.S., Delahanty, R.J., Prasad, H.C., McCauley, J.L., Han, Q., Jiang, L., Li, C., Folstein, S.E. & Blakely, R.D. (2005) Allelic heterogeneity at the serotonin transporter locus (SLC6A4) confers susceptibility to autism and rigid-compulsive behaviors. *Am J Hum Genet* **77**, 265–279.
- Varoqueaux, F., Aramuni, G., Rawson, R.L., Mohrmann, R., Missler, M., Gottmann, K., Zhang, W., Sudhof, T.C. & Brose, N. (2006) Neuroligins determine synapse maturation and function. *Neuron* **51**, 741–754.
- Veenstra-VanderWeele, J., Muller, C.L., Iwamoto, H., Sauer, J.E., Owens, W.A., Shah, C.R., Cohen, J., Mannangatti, P., Jessen, T., Thompson, B.J., Ye, R., Kerr, T.M., Carneiro, A.M., Crawley, J.N., Sanders-Bush, E., McMahon, D.G., Ramamoorthy, S., Daws, L.C., Sutcliffe, J.S. & Blakely, R.D. (2012) Autism gene variant causes hyperserotonemia, serotonin receptor hypersensitivity, social impairment and repetitive behavior. *Proc Natl Acad Sci U S A* **109**, 5469–5474.
- Visscher, P.M., Thompson, R. & Haley, C.S. (1996) Confidence intervals in QTL mapping by bootstrapping. *Genetics* **143**, 1013–1020.
- Voyiaziakis, E., Evgrafov, O., Li, D. et al. (2011) Association of SLC6A4 variants with obsessive-compulsive disorder in a large multicenter US family study. *Mol Psychiatry* **16**, 108–120.
- Watson, C. & Paxinos, G. (2010) *Chemoarchitectonic Atlas of the Mouse Brain*. Academic, London.
- Xiong, W., Grillet, N., Elledge, H.M., Wagner, T.F., Zhao, B., Johnson, K.R., Kazmierczak, P. & Muller, U. (2012) TMHS is an integral component of the mechanotransduction machinery of cochlear hair cells. *Cell* **151**, 1283–1295.
- Ye, R. & Blakely, R.D. (2011) Natural and engineered coding variation in antidepressant-sensitive serotonin transporters. *Neuroscience* **197**, 28–36.
- Ye, H., Liu, J. & Wu, J.Y. (2010) Cell adhesion molecules and their involvement in autism spectrum disorder. *Neurosignals* **18**, 62–71.
- Ye, R., Carneiro, A.M., Airey, D.C., Sanders-Bush, E., Williams, R.W., Lu, L., Wang, J., Zhang, B. & Blakely, R.D. (2014) Evaluation of heritable determinants of blood and brain serotonin homeostasis using recombinant inbred mice. *Genes Brain Behav* **13**, 247–260.
- Zhu, C.B., Lindler, K.M., Campbell, N.G., Sutcliffe, J.S., Hewlett, W.A. & Blakely, R.D. (2011) Colocalization and regulated physical association of presynaptic serotonin transporters with A(3) adenosine receptors. *Mol Pharmacol* **80**, 458–465.

## Supporting Information

Additional supporting information may be found in the online version of this article at the publisher's web-site:

**Figure S1:** Gene expression networks associated with determinants of midbrain dopamine synthesis and inactivation. Genes (top 25) with highest correlations with *Th* (a) or *Slc6a3* (b) are graphed separately based on the direction of correlation (green: positive; red: negative). Gene node sizes represent the significance of correlation. Gene pairs with correlation coefficients (Spearman rho) above 0.5 are connected by edges (green: positive; red: negative).

**Figure S2:** Gene expression networks associated with determinants of midbrain acetylcholine synthesis and choline reuptake. Genes (top 25) with highest correlations with *Chat* (a) or *Slc5a7* (b) are graphed separately based on the direction of correlation (green: positive; red: negative). Gene node sizes represent the significance of correlation. Gene pairs with correlation coefficients (Spearman rho) above 0.5 are connected by edges (green: positive; red: negative).

**Figure S3:** *Pcdh15<sup>3v-3J</sup>* mice have altered midbrain 5-HT levels. (a) Males [ $P < 0.05$ , Kruskal–Wallis test followed by Dunn's multiple comparison test,  $N = 4$  (*wt*), 17 (*het*) and 7 (*hom*)] and (b) females [ $NS$ ,  $N = 3$  (*wt*), 8 (*het*) and 5 (*hom*)].

**Figure S4:** The genotype for SNP rs6191324 is correlated with (a) midbrain SERT expression levels ( $P < 0.0001$ , Student's *t*-test), (b) midbrain *Slc18a2* mRNA expression levels ( $P < 0.05$ , Student's *t*-test), (c) midbrain 5-HT levels ( $P < 0.05$ , Student's *t*-test) and (d) blood 5-HT levels ( $P < 0.05$ , Student's *t*-test). rs6191324 is the nearest mapped marker to gene *Slc18a2* in BXD strains.

**Figure S5:** Gene expression networks associated with midbrain *Pcdh15*. Genes (top 25) with highest correlations with *Pcdh15* (probe A\_55\_P2176176, see *Discussion*) are graphed separately based on the direction of correlation (green: positive; red: negative). Gene node sizes represent the significance of correlation. Gene pairs with correlation coefficients (Spearman rho) above 0.5 are connected by edges (green: positive; red: negative).

**Table S1:** Animals used in this study. Number of animals and their genders from each BXD strain are listed for each experiment.

**Table S2:** Midbrain 5-HT gene networks seeded by *Tph2* or *Slc6a4* expression ( $P < 0.05$ , Spearman's rank test).

## Gene network analysis of serotonin transporter expression

**Table S3:** Midbrain DA gene networks seeded by *Th* ( $P < 0.05$ , Spearman's rank test) or *Slc6a3* expression ( $P < 0.05$ , Spearman's rank test).

**Table S4:** Midbrain ACh gene networks seeded by *Chat* ( $P < 0.05$ , Spearman's rank test) or *Slc5a7* expression ( $P < 0.05$ , Spearman's rank test).

**Table S5:** GeneNetwork archived phenotypes that correlated with SERT protein expression levels ( $P < 0.05$ , Spearman's rank test).

**Table S6:** Genes under loci above suggestive significance levels from interval mapping analysis of SERT protein expression levels.

**Table S7:** Gene network seeded by correlation with male midbrain SERT protein expression ( $P < 0.05$ , Spearman's rank test).

**Table S8:** List of common genes associated with male midbrain SERT protein expression levels identified from transcriptome and QTL analyses.

**Table S9:** Gene network seeded by correlation with male midbrain *Pcdh15* (A\_55\_P2176176) expression ( $P < 0.05$ , Spearman's rank test) and common genes between this network and gene network associated with male midbrain SERT protein expression (Table S7).
